# Supplementary material for: Dysregulated lncRNAs are Involved in the Progress of Sepsis by Constructing Regulatory Networks in Whole Blood Cells
Source: Front Pharmacol. 2021 Aug 17;12:678256. doi: 10.3389/fphar.2021.678256 (PMC8416166; doi:10.3389/fphar.2021.678256)
Supplement: Supplementary file 1 [file Table2.XLSX]

## Sheet: 1-CD2
code	Sample Name	Ct	Ct ref	Ct mean	△ct(-)		2-△ct	2-△△ct	Sd	RQ1
1	H2	21.4067	17.348	17.1395	-4.26719	2	0.0519337	0.779001	0.232449	1	0.066667
		21.0777	17.1054		-3.93812		0.0652391	0.978582
		20.7333	16.9652		-3.59374		0.0828281	1.24242
2	H3	20.1344	16.0238	16.1164	-4.01798		0.0617257	0.925882	0.0753547	0.979166	0.065278
		21.3077	16.1333		-5.19131
		19.9772	16.1921		-3.86081		0.0688303	1.03245
3	H4	20.1558	17.6479	17.5614	-2.59446		0.165573	2.48359	0.0820251	2.56933	0.17129
		20.1024	17.5859		-2.541		0.171824	2.57735
		20.0639	17.4504		-2.5025		0.176471	2.64705
4	H5	20.4517	16.8977	16.9379	-3.5138		0.0875466	1.31319	0.122405	1.18934	0.0792898
		20.7493	16.98		-3.81138		0.0712295	1.06844
		20.5982	16.9361		-3.6603		0.0790934	1.1864
5	H6	21.628	17.6453	17.7575	-3.87052		0.0683685	1.02552	0.169082	1.21788	0.0811924
		21.3025	17.7907		-3.54498		0.085675	1.28512
		21.2389	17.8365		-3.48143		0.0895337	1.343
6	H7	24.3387	24.6665	24.7469	0.408159		1.32699	19.9048	1.93758	21.6446	1.44298
		24.2412	24.8001		0.505649		1.41976	21.2963
		24.085	24.774		0.66192		1.58219	23.7327
7	H8	20.4942	16.8707	17.0293	-3.46489		0.0905658	1.35848	0.117438	1.42694	0.0951298
		20.2923	17.1786		-3.26299		0.10417	1.56254
		20.4928	17.0385		-3.46349		0.0906535	1.3598
8	H9	20.5515	16.4222	16.4857	-4.06577		0.0597145	0.895713	0.0682267	0.943957	0.048798
		22.0917	16.5947		-5.60594		0.0205326
		20.4039	16.4402		-3.91818		0.066147	0.9922
9	H10	20.2896	16.5694	16.5987	-3.6909		0.0774336	1.1615	0.228627	1.00976	0.067318
		20.9268	16.613		-4.32808		0.0497873	0.746807
		20.3408	16.6137		-3.74211		0.074733	1.12099
10	H11	20.7602	16.553	16.5828	-4.17738		0.0552691	0.829032	0.100772	0.93445	0.0622969
		20.4473	16.5562		-3.86448		0.0686553	1.02982
		20.5721	16.6393		-3.98927		0.0629664	0.944492
11	H12	21.2496	17.2349	17.1703	-4.07932		0.0591566	0.887345	0.173187	1.01256	0.0675045
		21.1662	17.1169		-3.99594		0.0626761	0.940137
		20.8019	17.159		-3.63163		0.0806807	1.21021
12	H13	20.0752	17.98	17.5932	-2.48201		0.178995	2.68492	0.958588	3.634	0.242268
		19.646	17.2132		-2.05279		0.241018	3.61526
		19.2979	17.5864		-1.70468		0.306789	4.60182
13	H14	22.4734	19.811	19.808	-2.66533		0.157636	2.36452	0.597515	3.04054	0.202704
		22.0104	19.6747		-2.20242		0.217273	3.25908
		21.9084	19.9383		-2.10035		0.233202	3.49802
14	H15	19.8884	17.0386	16.987	-2.90133		0.133848	2.00772	0.0137526	1.99799	0.1332
		21.3777	16.9109		-4.39061
		19.9024	17.0116		-2.91537		0.132552	1.98827
15	H16	21.4049	16.5832	16.4754	-4.92953		0.0328142	0.492211	0.133127	0.642607	0.0428406
		20.9171	16.5156		-4.44167		0.0460176	0.69026
		20.8063	16.3274		-4.3309		0.0496901	0.745349
16	H17	22.4608	16.2889	16.2802	-6.18057				0.0681259	1.13674	0.0757833
		20.0647	16.2791		-3.78445		0.0725718	1.08857
		19.9423	16.2727		-3.6621		0.0789948	1.18492
17	H18	19.5862	16.4839	16.7573	-2.82894		0.140736	2.11102	0.168738	1.93721	0.129148
		19.7181	17.2958		-2.96087		0.128437	1.92654
		19.8371	16.4921		-3.07983		0.118271	1.77405
18	H19	22.3576	16.582	16.7021	-5.65545				0.497771	2.86237	0.190825
		18.9245	16.7556		-2.22236		0.214291	3.21434
		19.2811	16.7688		-2.57897		0.16736	2.51039
19	H20	20.0102	16.1567	16.2796	-3.73059		0.0753322	1.12998	0.212306	1.34539	0.0896928
		19.7517	16.3491		-3.47207		0.0901159	1.35173
		19.5501	16.333		-3.27048		0.10363	1.55445
20	S1	20.6598	16.8229	16.814	-3.84584		0.0695484	1.04322	0.0984149	0.932191	0.0621464
		20.9457	16.7275		-4.1317		0.0570471	0.855703
		20.8766	16.8916		-4.06266		0.0598437	0.897651
21	S2	20.7933	16.463	16.4545	-4.3388		0.0494187	0.741278	0.0230149	0.760814	0.0507212
		20.7668	16.3976		-4.31237		0.0503322	0.75498
		20.7084	16.5028		-4.25394		0.0524126	0.786185
22	S3	20.4163	15.9129	16.0327	-4.38364		0.0479063	0.718592	0.0551013	0.692157	0.046144
		20.3955	15.9253		-4.36278		0.0486042	0.729059
		20.6089	16.26		-4.57617		0.0419214	0.628819
23	S5	24.0569	17.3359	17.3102	-6.74669		0.00931203	0.13968	0.00860179	0.141253	0.00941691
		24.1217	17.3217		-6.81147		0.00890313	0.133546
		23.949	17.2731		-6.63873		0.0100356	0.150533
24	S6	29.6977	23.541	23.6825	-6.01512		0.0154621	0.23193	0.0437039	0.28082	0.0187214
		29.251	23.6074		-5.56843		0.0210734	0.316099
		29.3534	23.8991		-5.67089		0.0196288	0.29443
25	S7	23.2621	17.4618	17.4961	-5.76592		0.0183774	0.27566	0.0630559	0.320247	0.0213499
		22.8577	17.5732		-5.36157		0.0243224	0.364835
		19.5876	17.4534		-2.09143
26	S8	24.6937	15.8678	15.9007	-8.79305		0.00225439	0.0338156	0.0044153	0.0327858	0.00218573
		24.5798	15.895		-8.67909		0.00243969	0.0365951
		24.9688	15.9393		-9.06807		0.00186311	0.0279466
27	S9	22.6084	16.4879	16.4574	-6.151		0.0140723	0.211083	0.0394987	0.239013	0.0159343
		22.2697	16.352		-5.81228		0.0177963	0.266943
		25.0313	16.5325		-8.57382
28	S10	21.7922	16.4358	16.3636	-5.42864		0.0232176	0.348262	0.0527516	0.288483	0.0192323
		22.2794	16.2266		-5.91577		0.0165643	0.248464
		22.1663	16.4284		-5.80269		0.017915	0.268723
29	S11	21.7345	16.3516	16.2814	-5.45317		0.0228262	0.342391	0.0626113	0.386664	0.0257777
		22.5833	15.9786		-6.3019
		21.4027	16.5139		-5.12133		0.0287293	0.430937
30	S12	23.5962	16.2938	16.5524	-7.04379		0.00757892	0.113683	0.00647446	0.121119	0.00807465
		23.4689	16.5716		-6.91652		0.00827789	0.124168
		23.4534	16.7916		-6.90105		0.00836715	0.125507
31	S13	24.1958	16.9056	17.0014	-7.1944		0.00682763	0.102414	0.00754934	0.108391	0.00722608
		24.1477	16.9746		-7.14633		0.00705893	0.105883
		24.0052	17.124		-7.00385		0.00779168	0.116875
32	S14	24.0888	19.1159	19.0574	-5.03147		0.0305757	0.458633	0.142288	0.617214	0.0411478
		23.5653	18.9408		-4.50791		0.0439526	0.659286
		23.4109	19.1154		-4.35358		0.048915	0.733722
33	S15	22.2256	17.7261	17.5557	-4.66989		0.0392846	0.589266	0.0320488	0.570657	0.038044
		22.2261	17.6887		-4.67041		0.0392706	0.589056
		22.3686	17.2524		-4.81292		0.0355769	0.533651
34	S16	21.5573	15.8928	15.9522	-5.60515		0.0205439	0.308157	0.0295338	0.339592	0.0226396
		21.3992	15.9531		-5.447		0.022924	0.343858
		21.3062	16.0107		-5.35397		0.0244508	0.36676
35	S17	24.6919	14.6709	14.7446	-9.94738		0.00101284	0.0151925	0.00247359	0.0179338	0.00119559
		24.3992	14.8624		-9.65468		0.00124066	0.0186098
		24.2954	14.7004		-9.55081		0.00133328	0.0199991
36	S18	23.0652	16.3625	16.2715	-6.79372		0.00901335	0.1352	0.0141108	0.150093	0.0100062
		22.7931	16.2799		-6.52162		0.0108842	0.163263
		22.898	16.172		-6.62649		0.0101211	0.151816
37	S19	21.0031	16.07	16.0921	-4.91097		0.0332391	0.498585	0.0219771	0.516927	0.0344619
		20.9679	16.1455		-4.87574		0.0340608	0.51091
		20.8846	16.0609		-4.79242		0.0360859	0.541286
38	S20	22.4367	17.2951	17.4181	-5.01863		0.030849	0.462732	0.0662405	0.420111	0.0280075
		22.8654	17.6197		-5.44725		0.0229199	0.343797
		22.4648	17.3395		-5.04674		0.0302538	0.453804
39	S21	23.8095	16.4551	16.7301	-7.07946		0.00739386	0.110907	0.0038148	0.106879	0.0071253
		23.9117	17.2575		-7.18167		0.00688813	0.103322
		23.8693	16.4776		-7.1392		0.00709391	0.106408
40	S22	23.8659	15.5096	15.6239	-8.24195		0.00330313	0.0495468	0.00830209	0.0439259	0.00292841
		23.9164	15.8426		-8.2925		0.00318939	0.0478407
		24.3927	15.5196		-8.76874		0.00229269	0.0343902
41	S4	22.4095	17.4589	17.3956	-5.0139		0.0309504	0.464253	0.11694	0.485105	0.0323405
		22.6984	17.4147		-5.30284		0.025333	0.379993
		22.0131	17.3132		-4.61748		0.0407381	0.611068
42	S23	20.0714	14.3094	14.4248	-5.64667		0.0199611	0.299414	0.0225596	0.32529	0.0216861
		19.9067	14.5221		-5.48196		0.0223751	0.335625
		19.8845	14.4428		-5.45976		0.0227221	0.34083

## Sheet: 2-ACSL1
code	Sample Name	Ct	Ct ref	Ct mean	△ct(-)		2-△ct	2-△△ct	Sd	RQ1
1	H2	16.7606	17.348	17.1395	0.378974	2			0.111769	1	2.20558
		16.1172	17.1054		1.02238		2.03127	0.920967
		15.8886	16.9652		1.2509		2.3799	1.07903
2	H3	18.5836	16.0238	16.1164	-2.46715		0.180848	0.0819955	0.00308754	0.0819608	0.180771
		18.6399	16.1333		-2.52348		0.173924	0.078856
		18.5311	16.1921		-2.41471		0.187543	0.0850308
3	H4	21.0841	17.6479	17.5614	-3.52273		0.0870064	0.0394483	0.00394525	0.0395185	0.0871614
		20.9431	17.5859		-3.38173		0.0959395	0.0434985
		21.2318	17.4504		-3.67046		0.0785384	0.0356089
4	H5	18.3181	16.8977	16.9379	-1.38018		0.38417	0.174181	0.0216226	0.178117	0.392852
		18.4521	16.98		-1.51417		0.350099	0.158733
		18.1084	16.9361		-1.17044		0.444287	0.201437
5	H6	19.9643	17.6453	17.7575	-2.20679		0.216616	0.0982126	0.000905288	0.0977062	0.215499
		19.9872	17.7907		-2.22976		0.213194	0.096661
		19.9638	17.8365		-2.20631		0.216687	0.0982449
6	H7	25.8309	24.6665	24.7469	-1.08398		0.471725	0.213878	0.0289792	0.18698	0.4124
		26.2834	24.8001		-1.53652		0.344715	0.156292
		25.9958	24.774		-1.24893		0.420761	0.190771
7	H8	17.0986	16.8707	17.0293	-0.0693366		0.953076	0.43212	0.0341958	0.393455	0.867797
		17.28	17.1786		-0.250752		0.840458	0.381059
		17.3335	17.0385		-0.304259		0.809858	0.367185
8	H9	17.5	16.4222	16.4857	-1.01424		0.49509	0.224471	0.0192834	0.222381	0.490481
		17.6511	16.5947		-1.16543		0.445833	0.202138
		17.4002	16.4402		-0.914522		0.53052	0.240535
9	H10	18.201	16.5694	16.5987	-1.60226		0.329361	0.149331	0.00730412	0.141242	0.31152
		18.3451	16.613		-1.74643		0.298039	0.135129
		18.3017	16.6137		-1.70293		0.307161	0.139265
10	H11	16.7322	16.553	16.5828	-0.149355		0.901654	0.408805	0.0178244	0.418822	0.923746
		16.7341	16.5562		-0.151283		0.900449	0.408259
		16.6281	16.6393		-0.045229		0.969136	0.439401
11	H12	16.1446	17.2349	17.1703	1.02563		2.03585	0.923046	0.0260922	0.952389	2.10057
		16.0863	17.1169		1.08398		2.11988	0.961141
		16.0686	17.159		1.10164		2.14599	0.97298
12	H13	18.4176	17.98	17.5932	-0.824347		0.564738	0.256049	0.0129745	0.271011	0.597737
		18.2998	17.2132		-0.706596		0.612764	0.277824
		18.2929	17.5864		-0.699677		0.61571	0.27916
13	H14	21.2079	19.811	19.808	-1.39988		0.37896	0.171819	0.00750455	0.163269	0.360104
		21.331	19.6747		-1.52294		0.347976	0.15777
		21.3088	19.9383		-1.50073		0.353375	0.160219
14	H15	17.5123	17.0386	16.987	-0.525228		0.694849	0.315041	0.0233164	0.341803	0.753874
		17.3289	16.9109		-0.341865		0.789021	0.357738
		17.3497	17.0116		-0.362619		0.777752	0.352629
15	H16	17.7396	16.5832	16.4754	-1.26417		0.416338	0.188766	0.0306093	0.197954	0.436605
		17.8655	16.5156		-1.39006		0.381548	0.172992
		17.4414	16.3274		-0.965986		0.511928	0.232106
16	H17	19.6454	16.2889	16.2802	-3.3652		0.0970455	0.0439999	0.0128852	0.0544247	0.120038
		18.9999	16.2791		-2.71965		0.151812	0.0688306
		19.4482	16.2727		-3.16803		0.111258	0.0504436
17	H18	20.0172	16.4839	16.7573	-3.2599		0.104394	0.0473315	0.00301159	0.049461	0.10909
		21.2127	17.2958		-4.45539
		19.8929	16.4921		-3.13559		0.113787	0.0515905
18	H19	19.4533	16.582	16.7021	-2.75117		0.14853	0.0673427	0.00533092	0.0615613	0.135779
		19.6079	16.7556		-2.90574		0.13344	0.0605008
		19.6979	16.7688		-2.99578		0.125366	0.0568403
19	H20	19.4606	16.1567	16.2796	-3.18097		0.110264	0.0499931	0.00465205	0.0448152	0.0988437
		19.7471	16.3491		-3.4675		0.0904019	0.0409878
		19.6624	16.333		-3.38285		0.0958653	0.0434649
20	S1	17.3669	16.8229	16.814	-0.552869		0.681663	0.309063	0.0363752	0.348613	0.768895
		17.1623	16.7275		-0.348316		0.785501	0.356142
		17.0664	16.8916		-0.252361		0.839522	0.380635
21	S2	18.1116	16.463	16.4545	-1.65713		0.31707	0.143758	0.0156629	0.125672	0.27718
		18.413	16.3976		-1.95857		0.257283	0.116651
		18.4136	16.5028		-1.95911		0.257187	0.116607
22	S3	18.914	15.9129	16.0327	-2.88126		0.135723	0.0615361	0.00866698	0.0522536	0.11525
		19.1891	15.9253		-3.1564		0.112157	0.0508516
		19.3857	16.26		-3.35301		0.0978685	0.0443731
23	S5	16.6199	17.3359	17.3102	0.690367		1.61369	0.731641	0.0573855	0.704366	1.55354
		16.8165	17.3217		0.49376		1.40811	0.63843
		16.5976	17.2731		0.712647		1.63881	0.743027
24	S6	25.4198	23.541	23.6825	-1.73725		0.299941	0.135992	0.000558463	0.136578	0.301234
		25.408	23.6074		-1.7255		0.302394	0.137104
		25.4129	23.8991		-1.73041		0.301367	0.136638
25	S7	18.0713	17.4618	17.4961	-0.575131		0.671225	0.30433	0.0324614	0.330957	0.729953
		17.9924	17.5732		-0.496297		0.708924	0.321423
		17.8007	17.4534		-0.304526		0.809708	0.367118
26	S8	16.0005	15.8678	15.9007	-0.0998004		0.933162	0.423091	0.0291876	0.392193	0.865014
		16.2132	15.895		-0.312531		0.805228	0.365086
		16.1239	15.9393		-0.223217		0.856653	0.388402
27	S9	17.5955	16.4879	16.4574	-1.1381		0.454356	0.206003	0.0331798	0.233678	0.515396
		17.2028	16.352		-0.745351		0.596523	0.27046
		17.471	16.5325		-1.0136		0.495309	0.224571
28	S10	17.4836	16.4358	16.3636	-1.11998		0.460099	0.208607	0.0325916	0.243894	0.537929
		17.0962	16.2266		-0.73258		0.601827	0.272865
		17.2212	16.4284		-0.857627		0.551859	0.25021
29	S11	17.0638	16.3516	16.2814	-0.782389		0.581403	0.263605	0.0686203	0.19419	0.428302
		17.5168	15.9786		-1.23538		0.42473	0.192571
		18.1242	16.5139		-1.84285		0.278771	0.126393
30	S12	16.6743	16.2938	16.5524	-0.121892		0.918981	0.416661	0.0912962	0.508588	1.12173
		16.15	16.5716		0.402367		1.32167	0.599241
		16.383	16.7916		0.169341		1.12454	0.509863
31	S13	16.7501	16.9056	17.0014	0.251279		1.19026	0.539658	0.0667922	0.529778	1.16847
		16.6188	16.9746		0.382586		1.30368	0.59108
		16.9849	17.124		0.0164572		1.01147	0.458596
32	S14	18.3671	19.1159	19.0574	0.690294		1.61361	0.731604	0.105599	0.816218	1.80024
		18.0138	18.9408		1.04352		2.06125	0.934562
		18.2701	19.1154		0.787302		1.72584	0.782489
33	S15	16.7659	17.7261	17.5557	0.789818		1.72886	0.783854	0.0748881	0.744263	1.64153
		17.0186	17.6887		0.537077		1.45103	0.657889
		16.7527	17.2524		0.802992		1.74472	0.791045
34	S16	17.1105	15.8928	15.9522	-1.15829		0.448043	0.20314	0.016093	0.220736	0.486852
		16.9671	15.9531		-1.01495		0.494844	0.22436
		16.9021	16.0107		-0.949898		0.517669	0.234708
35	S17	15.5121	14.6709	14.7446	-0.767556		0.587412	0.26633	0.043122	0.216638	0.477813
		16.0066	14.8624		-1.26207		0.416947	0.189041
		15.9652	14.7004		-1.22068		0.42908	0.194543
36	S18	18.1416	16.3625	16.2715	-1.87011		0.273553	0.124028	0.0124088	0.111189	0.245237
		18.3111	16.2799		-2.03961		0.24323	0.110279
		18.4629	16.172		-2.19148		0.218927	0.0992602
37	S19	17.9685	16.07	16.0921	-1.87635		0.272372	0.123492	0.0179417	0.104494	0.23047
		18.2422	16.1455		-2.15005		0.225305	0.102152
		18.46	16.0609		-2.36784		0.193735	0.0878385
38	S20	17.5944	17.2951	17.4181	-0.17627		0.884988	0.401249	0.0554006	0.416309	0.918204
		17.3428	17.6197		0.0752831		1.05357	0.477682
		17.7114	17.3395		-0.293262		0.816055	0.369995
39	S21	17.1715	16.4551	16.7301	-0.441479		0.736379	0.333871	0.0495238	0.284857	0.628275
		17.6792	17.2575		-0.9491		0.517955	0.234838
		17.3955	16.4776		-0.665455		0.63049	0.285861
40	S22	15.6967	15.5096	15.6239	-0.0728162		0.95078	0.431079	0.0654669	0.355535	0.784162
		16.1477	15.8426		-0.523771		0.695552	0.315359
		16.1259	15.5196		-0.501943		0.706155	0.320167
41	S4	19.9537	17.4589	17.3956	-2.55817		0.16979	0.0769821	0.00818583	0.0677328	0.14939
		20.2795	17.4147		-2.88396		0.13547	0.0614213
		20.2024	17.3132		-2.80681		0.142911	0.064795
42	S23	17.8677	14.3094	14.4248	-3.44295		0.0919537	0.0416913	0.00138949	0.0400986	0.0884409
		17.9467	14.5221		-3.52193		0.0870548	0.0394702
		17.959	14.4428		-3.53426		0.0863142	0.0391344

## Sheet: 3-IL7R
code	Sample Name	Ct	Ct ref	Ct mean	△ct(-)		2-△ct	2-△△ct	Sd	RQ1
1	H2	23.0309	17.348	17.1395	-5.89137	2	0.0168469	0.813567	0.27152	1	0.0207075
		22.926	17.1054		-5.78649		0.0181173	0.874917
		22.342	16.9652		-5.20247		0.0271582	1.31152
2	H3	20.1257	16.0238	16.1164	-4.00924		0.062101	2.99897	1.07249	2.84855	0.0589861
		20.9371	16.1333		-4.82073		0.0353846	1.70879
		19.7698	16.1921		-3.65339		0.0794729	3.83789
3	H4	20.4291	17.6479	17.5614	-2.86777		0.136998	6.61589	0.314001	6.28494	0.130145
		20.5117	17.5859		-2.95037		0.129375	6.24773
		20.5722	17.4504		-3.01086		0.124063	5.99121
4	H5	21.2176	16.8977	16.9379	-4.27966		0.0514866	2.48638	0.164002	2.48325	0.0514217
		21.128	16.98		-4.19008		0.0547849	2.64566
		21.319	16.9361		-4.38101		0.0479937	2.3177
5	H6	21.4613	17.6453	17.7575	-3.70381		0.0767438	3.7061	0.616688	3.91879	0.0811482
		21.5702	17.7907		-3.81272		0.0711632	3.4366
		21.1453	17.8365		-3.38779		0.0955374	4.61367
6	H7	26.3912	24.6665	24.7469	-1.64433		0.319894	15.4483	0.880101	15.5816	0.322656
		26.2944	24.8001		-1.54749		0.342104	16.5208
		26.4554	24.774		-1.70854		0.30597	14.7758
7	H8	19.9317	16.8707	17.0293	-2.90246		0.133743	6.4587	0.651539	6.05162	0.125314
		19.9458	17.1786		-2.91654		0.132445	6.396
		20.2169	17.0385		-3.18767		0.109753	5.30016
8	H9	19.8896	16.4222	16.4857	-3.40391		0.0944762	4.56242	0.508475	5.05046	0.104582
		19.7541	16.5947		-3.26838		0.103781	5.01179
		19.5999	16.4402		-3.11417		0.115489	5.57716
9	H10	19.1053	16.5694	16.5987	-2.50659		0.175971	8.49794	0.679814	7.7617	0.160725
		19.2609	16.613		-2.66214		0.157985	7.6294
		19.3529	16.6137		-2.7542		0.148219	7.15777
10	H11	20.6633	16.553	16.5828	-4.08048		0.0591088	2.85447	0.320716	2.87238	0.0594797
		20.4977	16.5562		-3.91488		0.0662986	3.20168
		20.8198	16.6393		-4.237		0.0530318	2.561
11	H12	20.9521	17.2349	17.1703	-3.78186		0.0727019	3.51091	0.227089	3.66742	0.0759429
		20.7902	17.1169		-3.61996		0.0813363	3.92787
		20.9307	17.159		-3.76042		0.0737904	3.56347
12	H13	20.3275	17.98	17.5932	-2.73433		0.150274	7.25702	1.13099	8.06376	0.16698
		19.9609	17.2132		-2.36773		0.19375	9.35652
		20.2651	17.5864		-2.67194		0.156916	7.57774
13	H14	23.2574	19.811	19.808	-3.44935		0.0915463	4.42094	0.919876	5.48016	0.11348
		22.7981	19.6747		-2.99003		0.125867	6.07832
		22.831	19.9383		-3.02294		0.123028	5.94123
14	H15	20.1828	17.0386	16.987	-3.19575		0.10914	5.27057	1.70357	3.81534	0.0790061
		21.6236	16.9109		-4.63654		0.0402032	1.94149
		20.4987	17.0116		-3.51169		0.0876748	4.23397
15	H16	20.4502	16.5832	16.4754	-3.97485		0.063599	3.07131	0.368847	3.40345	0.0704767
		20.1429	16.5156		-3.66755		0.0786968	3.80041
		20.3298	16.3274		-3.85445		0.0691344	3.33862
16	H17	20.2075	16.2889	16.2802	-3.92723				2.57292	9.00916	0.186557
		18.4372	16.2791		-2.15695		0.224231	10.8285
		19.028	16.2727		-2.74775		0.148883	7.18984
17	H18	17.6274	16.4839	16.7573	-0.870104		0.547107	26.4208	4.7742	25.4742	0.527507
		17.4584	17.2958		-0.701107		0.6151	29.7043
		18.0077	16.4921		-1.25046		0.420313	20.2977
18	H19	18.0959	16.582	16.7021	-1.3937		0.380586	18.3792	0.477152	18.2321	0.37754
		18.0772	16.7556		-1.37505		0.385538	18.6183
		18.1503	16.7688		-1.44814		0.366495	17.6987
19	H20	19.8756	16.1567	16.2796	-3.59597		0.0826997	3.99372	0.123224	4.13504	0.0856261
		19.8059	16.3491		-3.52629		0.0867922	4.19135
		19.796	16.333		-3.51645		0.0873863	4.22004
20	S1	21.6543	16.8229	16.814	-4.84031		0.0349078	1.68576	0.1659	1.85183	0.0383467
		21.5185	16.7275		-4.70448		0.0383539	1.85218
		21.3951	16.8916		-4.5811		0.0417785	2.01756
21	S2	21.3819	16.463	16.4545	-4.92746		0.0328614	1.58694	0.0785197	1.54843	0.0320641
		21.5041	16.3976		-5.04962		0.0301934	1.4581
		21.3699	16.5028		-4.91539		0.0331375	1.60027
22	S3	21.5437	15.9129	16.0327	-5.51094		0.0219301	1.05904	0.144798	0.9278	0.0192124
		21.9989	15.9253		-5.96616		0.0159959	0.772469
		21.6975	16.26		-5.66484		0.0197112	0.951889
23	S5	24.4609	17.3359	17.3102	-7.15071		0.00703754	0.339856	0.0815852	0.428002	0.00886283
		24.0776	17.3217		-6.7674		0.00917932	0.443286
		23.9014	17.2731		-6.59121		0.0103716	0.500864
24	S6	28.8316	23.541	23.6825	-5.14904		0.0281828	1.361	0.768791	1.90461	0.0394397
		31.6162	23.6074		-7.93366
		27.9845	23.8991		-4.30197		0.0506967	2.44823
25	S7	23.8785	17.4618	17.4961	-6.38232		0.0119876	0.5789	0.0272656	0.594156	0.0123035
		23.7665	17.5732		-6.27031		0.0129553	0.625634
		23.8809	17.4534		-6.38473		0.0119675	0.577933
26	S8	22.7207	15.8678	15.9007	-6.82002		0.00885056	0.427409	0.0533444	0.402006	0.00832453
		22.6857	15.895		-6.78503		0.00906783	0.437902
		23.0478	15.9393		-7.1471		0.0070552	0.340708
27	S9	21.9012	16.4879	16.4574	-5.44372		0.0229761	1.10956	0.201273	0.969186	0.0200694
		21.9679	16.352		-5.51044		0.0219378	1.05941
		22.4883	16.5325		-6.03087		0.0152942	0.738586
28	S10	23.0009	16.4358	16.3636	-6.6373		0.0100456	0.485119	0.0916434	0.379775	0.00786417
		23.6083	16.2266		-7.24472		0.00659357	0.318415
		23.5317	16.4284		-7.16808		0.00695335	0.335789
29	S11	21.2899	16.3516	16.2814	-5.0085		0.0310665	1.50026	0.298203	1.47486	0.0305405
		21.655	15.9786		-5.37366		0.0241194	1.16477
		21.0599	16.5139		-4.7785		0.0364358	1.75955
30	S12	23.1307	16.2938	16.5524	-6.57835		0.0104645	0.505351	0.0292869	0.481918	0.00997929
		23.1713	16.5716		-6.61898		0.0101739	0.491316
		23.301	16.7916		-6.74865		0.00929941	0.449085
31	S13	22.9295	16.9056	17.0014	-5.92811		0.0164234	0.793113	0.108683	0.899185	0.0186198
		22.7565	16.9746		-5.75513		0.0185154	0.894139
		22.5803	17.124		-5.57892		0.0209208	1.0103
32	S14	25.2995	19.1159	19.0574	-6.24216		0.0132106	0.637961	0.0821107	0.629785	0.0130412
		25.1503	18.9408		-6.0929		0.0146506	0.707501
		25.5297	19.1154		-6.47231		0.0112626	0.543892
33	S15	21.8196	17.7261	17.5557	-4.26383		0.0520545	2.51381	0.266592	2.56359	0.0530854
		21.6377	17.6887		-4.08195		0.0590486	2.85156
		21.9319	17.2524		-4.37623		0.0481531	2.3254
34	S16	19.9819	15.8928	15.9522	-4.02975		0.0612244	2.95664	0.503082	2.79302	0.0578364
		19.8706	15.9531		-3.91837		0.0661382	3.19393
		20.3898	16.0107		-4.43763		0.0461466	2.2285
35	S17	24.2874	14.6709	14.7446	-9.54281		0.00134069	0.0647443	0.0157065	0.0804179	0.00166525
		23.7167	14.8624		-8.97217		0.00199117	0.0961571
		23.9758	14.7004		-9.23122		0.0016639	0.0803525
36	S18	22.7727	16.3625	16.2715	-6.50128		0.0110388	0.533082	0.094955	0.435907	0.00902653
		23.4075	16.2799		-7.136		0.00710968	0.343339
		23.0784	16.172		-6.80694		0.00893115	0.431301
37	S19	21.359	16.07	16.0921	-5.26682		0.0259735	1.2543	0.117502	1.17186	0.0242661
		21.3943	16.1455		-5.30216		0.0253449	1.22395
		21.633	16.0609		-5.54086		0.0214801	1.03731
38	S20	23.3134	17.2951	17.4181	-5.89533		0.0168007	0.811336	0.127327	0.909724	0.0188381
		23.2222	17.6197		-5.8041		0.0178975	0.864303
		22.9366	17.3395		-5.51847		0.021816	1.05353
39	S21	25.0297	16.4551	16.7301	-8.29966		0.0031736	0.153259	0.0392076	0.194681	0.00403134
		24.6488	17.2575		-7.91875		0.00413254	0.199568
		24.4364	16.4776		-7.70639		0.00478789	0.231216
40	S22	24.0045	15.5096	15.6239	-8.38061		0.00300043	0.144896	0.00599456	0.138	0.00285763
		24.1059	15.8426		-8.48198		0.00279684	0.135065
		24.1169	15.5196		-8.49299		0.0027756	0.134039
41	S4	21.7108	17.4589	17.3956	-4.31524		0.0502322	2.4258	0.175704	2.29482	0.04752
		21.9222	17.4147		-4.52665		0.0433852	2.09515
		21.7483	17.3132		-4.35277		0.0489424	2.36352
42	S23	21.1648	14.3094	14.4248	-6.74004		0.00935501	0.45177	0.0389641	0.496757	0.0102866
		20.9623	14.5221		-6.53753		0.0107648	0.519854
		20.9657	14.4428		-6.54088		0.0107398	0.518646

## Sheet: 4-LINC00861
code	Sample Name	Ct	Ct ref	Ct mean	△ct(-)		2-△ct	2-△△ct	Sd	RQ1
1	H2	25.4024	17.348	17.1395	-8.26282	2	0.0032557	0.828039	0.154347	1	0.00393182
		25.0661	17.1054		-7.92651		0.0041104	1.04542
		24.9582	16.9652		-7.81869		0.00442936	1.12654
2	H3	23.6308	16.0238	16.1164	-7.5144		0.0054694	1.39106	0.082932	1.33318	0.00524181
		23.7988	16.1333		-7.68238		0.00486825	1.23817
		23.6525	16.1921		-7.53609		0.00538778	1.3703
3	H4	23.0909	17.6479	17.5614	-5.52954		0.0216492	5.50615	0.423906	5.85808	0.0230329
		23.031	17.5859		-5.46968		0.0225663	5.73942
		22.89	17.4504		-5.32868		0.0248832	6.32867
4	H5	24.6626	16.8977	16.9379	-7.72462		0.00472778	1.20244	0.120701	1.18138	0.00464496
		24.856	16.98		-7.9181		0.00413442	1.05153
		24.561	16.9361		-7.62304		0.00507267	1.29016
5	H6	22.95	17.6453	17.7575	-5.19253		0.027346	6.95506	0.344311	7.35227	0.0289078
		22.8342	17.7907		-5.07675		0.0296311	7.53622
		22.8286	17.8365		-5.07115		0.0297463	7.56553
6	H7	27.9121	24.6665	24.7469	-3.16521		0.111475	28.3521	4.00669	31.878	0.125339
		27.5582	24.8001		-2.81127		0.14247	36.2351
		27.7811	24.774		-3.03421		0.122071	31.0468
7	H8	23.1496	16.8707	17.0293	-6.12035		0.0143744	3.65592	0.387502	4.06967	0.0160012
		22.9741	17.1786		-5.94479		0.0162345	4.12901
		22.8745	17.0385		-5.84521		0.0173947	4.42408
8	H9	23.8008	16.4222	16.4857	-7.31512		0.00627957	1.59712	0.290871	1.90943	0.00750753
		23.3569	16.5947		-6.87117		0.00854225	2.17259
		23.5065	16.4402		-7.02078		0.00770079	1.95858
9	H10	21.7362	16.5694	16.5987	-5.1375		0.0284091	7.22545	0.588821	7.78689	0.0306166
		21.6378	16.613		-5.03909		0.0304146	7.73551
		21.519	16.6137		-4.92025		0.0330262	8.39972
10	H11	25.4536	16.553	16.5828	-8.87074		0.0021362	0.54331	0.0819603	0.608113	0.00239099
		25.0875	16.5562		-8.50465		0.00275324	0.700247
		25.3574	16.6393		-8.77452		0.00228353	0.580783
11	H12	25.5485	17.2349	17.1703	-8.37821		0.00300543	0.764387	0.0332263	0.737021	0.00289783
		25.6753	17.1169		-8.50506		0.00275247	0.700051
		25.5824	17.159		-8.41213		0.0029356	0.746626
12	H13	24.5201	17.98	17.5932	-6.9269		0.00821853	2.09026	0.264992	2.38923	0.00939401
		24.208	17.2132		-6.61477		0.0102036	2.59514
		24.2721	17.5864		-6.67892		0.00975988	2.48228
13	H14	26.9187	19.811	19.808	-7.11065		0.0072357	1.84029	0.139608	1.94214	0.00763613
		26.8842	19.6747		-7.07615		0.00741084	1.88484
		26.7273	19.9383		-6.91932		0.00826184	2.10128
14	H15	24.5318	17.0386	16.987	-7.54472		0.00535567	1.36214	0.026622	1.38112	0.00543032
		24.5238	16.9109		-7.53675		0.00538533	1.36968
		24.4803	17.0116		-7.4933		0.00554997	1.41155
15	H16	24.328	16.5832	16.4754	-7.85265		0.0043263	1.10033	0.160331	1.24016	0.00487608
		24.197	16.5156		-7.72156		0.00473781	1.20499
		23.965	16.3274		-7.48963		0.00556413	1.41515
16	H17	22.495	16.2889	16.2802	-6.2148		0.0134635	3.42425	0.364491	3.8361	0.0150829
		22.2828	16.2791		-6.00257		0.0155972	3.96692
		22.2292	16.2727		-5.94895		0.0161878	4.11713
17	H18	20.9536	16.4839	16.7573	-4.19638		0.0545459	13.873	1.82593	12.1993	0.0479653
		21.39	17.2958		-4.63276		0.0403089	10.252
		21.1071	16.4921		-4.34987		0.049041	12.4729
18	H19	22.3542	16.582	16.7021	-5.65208		0.0198863	5.05779	0.31342	4.70799	0.018511
		22.4869	16.7556		-5.78474		0.0181393	4.61347
		22.5381	16.7688		-5.8359		0.0175072	4.45271
19	H20	20.6779	16.1567	16.2796	-4.39832		0.0474215	12.061	0.589381	11.5089	0.0452508
		20.7369	16.3491		-4.45734		0.0455205	11.5775
		20.8255	16.333		-4.54589		0.0428104	10.8882
20	S1	25.2297	16.8229	16.814	-8.41568		0.00292839	0.744792	0.093455	0.805989	0.003169
		25.2012	16.7275		-8.38725		0.00298666	0.759613
		24.935	16.8916		-8.12101		0.00359196	0.913562
21	S2	25.006	16.463	16.4545	-8.5515		0.00266528	0.677875	0.130525	0.694765	0.00273169
		25.2472	16.3976		-8.7927		0.00225492	0.573507
		24.7088	16.5028		-8.25435		0.00327486	0.832913
22	S3	25.3981	15.9129	16.0327	-9.36539		0.00151613	0.385604	0.0276825	0.399701	0.00157155
		25.2355	15.9253		-9.20284		0.00169695	0.431595
		25.412	16.26		-9.3793		0.00150158	0.381904
23	S5	27.2485	17.3359	17.3102	-9.93824		0.00101928	0.259238	0.0047632	0.264727	0.00104086
		27.2017	17.3217		-9.89149		0.00105284	0.267775
		27.205	17.2731		-9.89477		0.00105045	0.267167
24	S6	31.5237	23.541	23.6825	-7.84111		0.00436104	1.10917	0.320172	0.88277	0.00347089
		33.0455	23.6074		-9.36292
		32.2805	23.8991		-8.598		0.00258074	0.656374
25	S7	28.1639	17.4618	17.4961	-10.6678		0.000614719	0.156345	0.0199689	0.175183	0.000688789
		28.0172	17.5732		-10.521		0.000680551	0.173088
		27.8369	17.4534		-10.3408		0.000771097	0.196117
26	S8	26.7813	15.8678	15.9007	-10.8806		0.000530395	0.134898	0.0155408	0.116963	0.000459879
		27.1092	15.895		-11.2085		0.000422578	0.107476
		27.0953	15.9393		-11.1946		0.000426662	0.108515
27	S9	26.7856	16.4879	16.4574	-10.3281		0.000777906	0.197849	0.021222	0.181407	0.000713261
		26.8522	16.352		-10.3947		0.00074281	0.188923
		27.1151	16.5325		-10.6576		0.000619066	0.15745
28	S10	26.1326	16.4358	16.3636	-9.76896		0.00114617	0.291512	0.0359514	0.254255	0.000999686
		26.3456	16.2266		-9.98205		0.000988787	0.251483
		26.5401	16.4284		-10.1765		0.000864096	0.21977
29	S11	25.9335	16.3516	16.2814	-9.65214		0.00124284	0.316098	0.0255738	0.341783	0.00134383
		25.7172	15.9786		-9.43578		0.00144394	0.367244
		25.8199	16.5139		-9.53849		0.00134471	0.342006
30	S12	28.2755	16.2938	16.5524	-11.7232		0.000295781	0.0752275	0.00710826	0.0670201	0.000263511
		28.5316	16.5716		-11.9792		0.000247682	0.0629944
		28.5352	16.7916		-11.9828		0.000247069	0.0628383
31	S13	28.9619	16.9056	17.0014	-11.9605		0.000250911	0.0638154	0.00298393	0.0645626	0.000253848
		28.8735	16.9746		-11.8721		0.00026677	0.0678491
		29.003	17.124		-12.0016		0.000243864	0.0620233
32	S14	27.3847	19.1159	19.0574	-8.32733		0.00311331	0.791825	0.14051	0.938158	0.00368867
		26.9476	18.9408		-7.89027		0.00421496	1.07201
		27.121	19.1154		-8.06362		0.00373774	0.950638
33	S15	25.8957	17.7261	17.5557	-8.33996		0.00308618	0.784924	0.0530834	0.812685	0.00319533
		25.9062	17.6887		-8.35045		0.00306382	0.779237
		25.7408	17.2524		-8.18506		0.00343599	0.873892
34	S16	25.5452	15.8928	15.9522	-9.59298		0.00129487	0.32933	0.0265456	0.329988	0.00129745
		25.4294	15.9531		-9.47717		0.0014031	0.356857
		25.6617	16.0107		-9.7095		0.0011944	0.303778
35	S17	27.7998	14.6709	14.7446	-13.0552		0.000117488	0.0298814	0.00542204	0.0327425	0.000128737
		27.4157	14.8624		-12.6711		0.000153324	0.0389958
		27.8256	14.7004		-13.0811		0.0001154	0.0293502
36	S18	27.1574	16.3625	16.2715	-10.8859		0.000528457	0.134405	0.0131934	0.149232	0.000586754
		26.9088	16.2799		-10.6374		0.000627819	0.159677
		26.9647	16.172		-10.6932		0.000603985	0.153615
37	S19	26.0815	16.07	16.0921	-9.98936		0.000983789	0.250212	0.0173235	0.251422	0.000988545
		26.1736	16.1455		-10.0815		0.000922935	0.234735
		25.9753	16.0609		-9.8832		0.00105891	0.269318
38	S20	26.3485	17.2951	17.4181	-8.93039		0.00204967	0.521304	0.0373361	0.479446	0.0018851
		26.5621	17.6197		-9.14394		0.00176766	0.449578
		26.5058	17.3395		-9.08768		0.00183796	0.467457
39	S21	28.7659	16.4551	16.7301	-12.0359		0.000238143	0.0605681	0.00591948	0.0563824	0.000221685
		29.9736	17.2575		-13.2435
		28.9805	16.4776		-12.2505		0.000205228	0.0521967
40	S22	27.9797	15.5096	15.6239	-12.3557		0.000190788	0.0485241	0.00728856	0.0405642	0.000159491
		28.2967	15.8426		-12.6728		0.000153149	0.0389512
		28.4836	15.5196		-12.8597		0.000134536	0.0342173
41	S4	28.2995	17.4589	17.3956	-10.9039		0.000521915	0.132741	0.00775479	0.125757	0.000494453
		28.3619	17.4147		-10.9664		0.000499802	0.127117
		28.4765	17.3132		-11.0809		0.000461642	0.117412
42	S23	25.2765	14.3094	14.4248	-10.8517		0.000541126	0.137628	0.0224786	0.125317	0.000492725
		25.2627	14.5221		-10.8379		0.000546333	0.138952
		25.7464	14.4428		-11.3216		0.000390714	0.0993724

## Sheet: 5-RP11-284N8.3
code	Sample Name	Ct	Ct ref	Ct mean	△ct(-)		2-△ct	2-△△ct	Sd	RQ1
1	H2	25.0798	17.348	17.1395	-7.94021	2	0.00407155	1.00133	0.0942811	1	0.00406614
		24.9526	17.1054		-7.81303		0.00444677	1.09361
		25.2256	16.9652		-8.08604		0.00368011	0.905061
2	H3	23.849	16.0238	16.1164	-7.73258		0.00470178	1.15632	0.053779	1.20894	0.00491572
		23.7208	16.1333		-7.60434		0.00513884	1.26381
		23.7875	16.1921		-7.67108		0.00490654	1.20668
3	H4	23.5537	17.6479	17.5614	-5.99232		0.0157084	3.86323	0.196108	3.64166	0.0148075
		23.667	17.5859		-6.10566		0.0145216	3.57135
		23.7001	17.4504		-6.13873		0.0141924	3.4904
4	H5	24.4773	16.8977	16.9379	-7.53938		0.0053755	1.32202	0.06544	1.27581	0.00518763
		24.4966	16.98		-7.55864		0.00530424	1.30449
		24.6159	16.9361		-7.67797		0.00488314	1.20093
5	H6	24.4502	17.6453	17.7575	-6.69272		0.00966699	2.37744	0.18437	2.5866	0.0105175
		24.2899	17.7907		-6.53241		0.0108031	2.65685
		24.2531	17.8365		-6.49559		0.0110824	2.72552
6	H7	26.9714	24.6665	24.7469	-2.22452		0.213969	52.6222	7.724	59.1136	0.240364
		26.8545	24.8001		-2.10766		0.232024	57.0624
		26.6089	24.774		-1.86198		0.275099	67.6561
7	H8	23.868	16.8707	17.0293	-6.8387		0.0087367	2.14865	0.167143	2.26394	0.0092055
		23.8421	17.1786		-6.81281		0.00889488	2.18755
		23.6753	17.0385		-6.64603		0.00998494	2.45563
8	H9	24.0856	16.4222	16.4857	-7.59992		0.00515461	1.26769	0.0723289	1.33382	0.0054235
		24.0243	16.5947		-7.53863		0.00537832	1.32271
		23.9311	16.4402		-7.44534		0.00573758	1.41106
9	H10	23.7903	16.5694	16.5987	-7.19158		0.00684098	1.68243	0.317239	1.88877	0.00767999
		23.7502	16.613		-7.1515		0.00703368	1.72982
		23.3683	16.6137		-6.7696		0.00916533	2.25406
10	H11	24.6735	16.553	16.5828	-8.0907		0.00366823	0.902139	0.083162	0.945416	0.0038442
		24.4666	16.5562		-7.88375		0.00423404	1.04129
		24.6885	16.6393		-8.10569		0.00363032	0.892817
11	H12	24.5684	17.2349	17.1703	-7.39809		0.0059286	1.45804	0.242514	1.55307	0.006315
		24.2416	17.1169		-7.0713		0.00743578	1.82871
		24.6556	17.159		-7.48536		0.00558061	1.37246
12	H13	24.0861	17.98	17.5932	-6.4929		0.0111031	2.73062	1.3359	3.67524	0.0149441
		22.8962	17.2132		-5.30296
		23.3275	17.5864		-5.73427		0.018785	4.61987
13	H14	25.8939	19.811	19.808	-6.08586		0.0147223	3.6207	0.262802	3.51349	0.0142863
		26.0658	19.6747		-6.25774		0.0130687	3.21403
		25.8604	19.9383		-6.05236		0.0150681	3.70575
14	H15	24.2911	17.0386	16.987	-7.30409		0.00632774	1.5562	0.172867	1.70738	0.00694244
		24.1893	16.9109		-7.20221		0.00679078	1.67008
		24.0063	17.0116		-7.01928		0.00770879	1.89585
15	H16	23.9805	16.5832	16.4754	-7.50512		0.0055047	1.35379	0.138477	1.19395	0.00485476
		24.2665	16.5156		-7.7911		0.00451486	1.11035
		24.257	16.3274		-7.7816		0.00454471	1.1177
16	H17	23.2175	16.2889	16.2802	-6.9373		0.00815951	2.0067	0.0716654	2.08775	0.00848908
		23.1425	16.2791		-6.86227		0.0085951	2.11382
		23.1229	16.2727		-6.84268		0.00871263	2.14273
17	H18	33.9595	16.4839	16.7573	-17.2022		6.63163e-06	0.00163094	0.000223566	0.00178902	7.27442e-06
		32.8141	17.2958		-16.0568
		33.7038	16.4921		-16.9466		7.91722e-06	0.00194711
18	H19	33.3844	16.582	16.7021	-16.6823		9.50908e-06	0.0023386	0.000470276	0.00239102	9.72223e-06
		33.0813	16.7556		-16.3792		1.17321e-05	0.00288531
		33.6472	16.7688		-16.9451		7.92553e-06	0.00194915
19	H20	33.0907	16.1567	16.2796	-16.8111		8.69682e-06	0.00213884	0.000250422	0.00185799	7.55483e-06
		33.4581	16.3491		-17.1785		6.74149e-06	0.00165796
		33.3579	16.333		-17.0783		7.22618e-06	0.00177716
20	S1	32.8935	16.8229	16.814	-16.0795		1.44402e-05	0.00355133	0.000713775	0.00275192	1.11897e-05
		33.5986	16.7275		-16.7846		8.85799e-06	0.00217848
		33.3851	16.8916		-16.5711		1.02709e-05	0.00252597
21	S2	33.1008	16.463	16.4545	-16.6464		9.74872e-06	0.00239754	0.000488673	0.00235264	9.56615e-06
		32.8681	16.3976		-16.4136		1.14556e-05	0.00281731
		33.4803	16.5028		-17.0258		7.49415e-06	0.00184306
22	S3	33.3867	15.9129	16.0327	-17.354		5.96936e-06	0.00146807	0.000409214	0.0018026	7.32961e-06
		32.765	15.9253		-16.7323		9.18486e-06	0.00225886
		33.1914	16.26		-17.1587		6.83461e-06	0.00168086
23	S5	33.2677	17.3359	17.3102	-15.9574		1.57157e-05	0.00386502	0.000437969	0.00401197	1.63132e-05
		33.0468	17.3217		-15.7365		1.8316e-05	0.00450451
		33.3438	17.2731		-16.0336		1.4908e-05	0.00366637
24	S6	32.7311	23.541	23.6825	-9.04859		0.00188844	0.464431	0.0675586	0.416659	0.0016942
		33.985	23.6074		-10.3025
		33.0634	23.8991		-9.38087		0.00149995	0.368888
25	S7	26.033	17.4618	17.4961	-8.53684		0.00269249	0.662174	0.0302768	0.654561	0.00266154
		26.1251	17.5732		-8.62899		0.0025259	0.621204
		25.994	17.4534		-8.49787		0.00276621	0.680304
26	S8	24.97	15.8678	15.9007	-9.06936		0.00186145	0.457794	0.0735614	0.381027	0.00154931
		25.2612	15.895		-9.3605		0.00152128	0.374133
		25.5271	15.9393		-9.62641		0.0012652	0.311156
27	S9	25.2554	16.4879	16.4574	-8.79795		0.00224674	0.552548	0.044005	0.50457	0.00205165
		25.4138	16.352		-8.95641		0.00201304	0.495074
		25.5009	16.5325		-9.04345		0.00189518	0.466088
28	S10	24.5797	16.4358	16.3636	-8.21607		0.00336293	0.827057	0.172932	0.699534	0.0028444
		24.685	16.2266		-8.32136		0.00312624	0.768847
		25.298	16.4284		-8.93436		0.00204404	0.502698
29	S11	24.5355	16.3516	16.2814	-8.25411		0.0032754	0.805531	0.0598341	0.737537	0.00299893
		24.7092	15.9786		-8.42781		0.00290387	0.71416
		24.7527	16.5139		-8.47136		0.00281751	0.692921
30	S12	27.1049	16.2938	16.5524	-10.5526		0.000665819	0.163747	0.0221427	0.172039	0.000699533
		26.8373	16.5716		-10.2849		0.00080156	0.19713
		27.1819	16.7916		-10.6296		0.000631221	0.155238
31	S13	26.8553	16.9056	17.0014	-9.85392		0.00108062	0.265761	0.0562046	0.294154	0.00119607
		26.4219	16.9746		-9.4205		0.0014593	0.358891
		26.8991	17.124		-9.89774		0.0010483	0.257811
32	S14	26.0824	19.1159	19.0574	-7.02504		0.00767808	1.8883	0.222519	1.70136	0.00691795
		26.1835	18.9408		-7.12611		0.0071586	1.76054
		26.4582	19.1154		-7.40088		0.00591716	1.45523
33	S15	25.581	17.7261	17.5557	-8.02526		0.00383846	0.944007	0.0856455	0.868767	0.00353253
		25.8645	17.6887		-8.30881		0.00315355	0.775565
		25.6713	17.2524		-8.11556		0.00360556	0.886728
34	S16	24.8885	15.8928	15.9522	-8.93626		0.00204135	0.502036	0.0784257	0.443789	0.00180451
		25.39	15.9531		-9.4378		0.00144191	0.354615
		24.9692	16.0107		-9.01699		0.00193026	0.474716
35	S17	27.6286	14.6709	14.7446	-12.884		0.000132288	0.032534	0.00320769	0.033731	0.000137155
		27.4289	14.8624		-12.6843		0.000151932	0.0373651
		27.6847	14.7004		-12.9401		0.000127246	0.031294
36	S18	25.5644	16.3625	16.2715	-9.2929		0.00159426	0.392082	0.0239138	0.3766	0.00153131
		25.732	16.2799		-9.46059		0.00141932	0.349058
		25.577	16.172		-9.30554		0.00158035	0.388661
37	S19	25.3429	16.07	16.0921	-9.25077		0.0016415	0.403701	0.0277649	0.377394	0.00153454
		25.4298	16.1455		-9.33764		0.00154558	0.38011
		25.5556	16.0609		-9.46343		0.00141652	0.348371
38	S20	26.1692	17.2951	17.4181	-8.75113		0.00232085	0.570774	0.0290469	0.599975	0.00243958
		26.0294	17.6197		-8.6113		0.00255705	0.628865
		26.0965	17.3395		-8.6784		0.00244085	0.600287
39	S21	27.3539	16.4551	16.7301	-10.6239		0.000633716	0.155852	0.0200617	0.143575	0.000583797
		27.367	17.2575		-10.6369		0.000628014	0.15445
		27.726	16.4776		-10.9959		0.000489661	0.120424
40	S22	25.7038	15.5096	15.6239	-10.0799		0.000923974	0.227236	0.0229303	0.204597	0.00083192
		25.8512	15.8426		-10.2272		0.000834243	0.205168
		26.0289	15.5196		-10.405		0.000737542	0.181386
41	S4	25.3221	17.4589	17.3956	-7.92655		0.00411027	1.01085	0.0887925	0.913607	0.00371486
		25.5008	17.4147		-8.1052		0.00363154	0.893118
		25.5947	17.3132		-8.19908		0.00340275	0.836851
42	S23	24.4748	14.3094	14.4248	-10.0501		0.000943252	0.231977	0.0160627	0.240241	0.000976855
		24.3173	14.5221		-9.89247		0.00105213	0.258753
		24.4872	14.4428		-10.0625		0.000935184	0.229993

## Sheet: 6-CTB-61M7.2
code	Sample Name	Ct	Ct ref	Ct mean	△ct(-)		2-△ct	2-△△ct	Sd	RQ1
1	H2	21.4204	17.348	17.1395	-4.28089	2	0.0514428	0.819566	0.264439	1	0.0627684
		21.3229	17.1054		-4.18336		0.0550407	0.876885
		20.7509	16.9652		-3.61137		0.0818217	1.30355
2	H3	21.1736	16.0238	16.1164	-5.05718		0.0300357	0.478516	0.0510023	0.425206	0.0266895
		21.5181	16.1333		-5.40165		0.0236559	0.376876
		21.361	16.1921		-5.24458		0.0263769	0.420226
3	H4	23.2104	17.6479	17.5614	-5.649		0.0199289	0.317499	0.0117929	0.305707	0.0191888
		23.3217	17.5859		-5.76036		0.0184484	0.293913
		23.2649	17.4504		-5.70358		0.0191889	0.30571
4	H5	21.276	16.8977	16.9379	-4.3381		0.0494428	0.787702	0.127221	0.69502	0.0436253
		21.7943	16.98		-4.85638		0.034521	0.549974
		21.3518	16.9361		-4.41389		0.0469122	0.747385
5	H6	23.2508	17.6453	17.7575	-5.49334		0.0221994	0.353672	0.0926194	0.457989	0.0287472
		22.7812	17.7907		-5.02375		0.0307398	0.489733
		22.6657	17.8365		-4.90822		0.0333026	0.530562
6	H7	26.1906	24.6665	24.7469	-1.44373		0.367616	5.85671	0.759262	5.62997	0.353384
		26.4827	24.8001		-1.73585		0.300232	4.78317
		26.0968	24.774		-1.34995		0.392305	6.25004
7	H8	22.1353	16.8707	17.0293	-5.10602		0.0290359	0.462588	0.047392	0.512714	0.0321823
		21.8679	17.1786		-4.83861		0.0349489	0.556791
		21.9699	17.0385		-4.94067		0.032562	0.518764
8	H9	21.1994	16.4222	16.4857	-4.7137		0.0381096	0.607146	0.0967966	0.495843	0.0311233
		21.6926	16.5947		-5.20693		0.0270744	0.431338
		21.6346	16.4402		-5.14888		0.0281859	0.449046
9	H10	22.2503	16.5694	16.5987	-5.65157		0.0198933	0.316932	0.0264182	0.290504	0.0182345
		22.5134	16.613		-5.91469		0.0165769	0.264095
		22.376	16.6137		-5.77728		0.0182332	0.290484
10	H11	21.0704	16.553	16.5828	-4.48754		0.0445775	0.710191	0.0670772	0.786583	0.0493726
		20.8353	16.5562		-4.25251		0.0524647	0.835846
		20.8741	16.6393		-4.29123		0.0510755	0.813713
11	H12	20.1946	17.2349	17.1703	-3.02431		0.122912	1.95818	0.798932	2.27852	0.143019
		20.4075	17.1169		-3.23725		0.106045	1.68947
		19.4915	17.159		-2.32121		0.2001	3.18791
12	H13	22.0716	17.98	17.5932	-4.47836		0.0448621	0.714724	0.1908	0.84964	0.0533306
		21.6095	17.2132		-4.01627		0.061799	0.984557
		20.7925	17.5864		-3.19933
13	H14	24.7921	19.811	19.808	-4.98412		0.0315958	0.503372	0.0294715	0.533179	0.0334668
		24.7073	19.6747		-4.89928		0.0335097	0.533863
		24.6324	19.9383		-4.8244		0.0352949	0.562303
14	H15	20.8914	17.0386	16.987	-3.9044		0.0667819	1.06394	0.108692	0.987085	0.0619577
		22.3691	16.9109		-5.38203
		21.1166	17.0116		-4.12952		0.0571336	0.910228
15	H16	21.638	16.5832	16.4754	-5.16264		0.0279185	0.444786	0.14482	0.602212	0.0377999
		21.131	16.5156		-4.65563		0.039675	0.632085
		20.9237	16.3274		-4.44831		0.0458062	0.729766
16	H17	24.2008	16.2889	16.2802	-7.92056				0.0177751	0.196219	0.0123164
		22.5339	16.2791		-6.25371		0.0131053	0.208788
		22.719	16.2727		-6.43878		0.0115274	0.18365
17	H18	22.5231	16.4839	16.7573	-5.76583		0.0183786	0.292801	0.0149688	0.306783	0.0192563
		22.3834	17.2958		-5.62612		0.0202475	0.322574
		22.4643	16.4921		-5.70706		0.0191428	0.304974
18	H19	24.698	16.582	16.7021	-7.99582				0.0293739	0.347662	0.0218222
		22.1365	16.7556		-5.43434		0.0231259	0.368433
		22.3091	16.7688		-5.60693		0.0205185	0.326892
19	H20	22.2729	16.1567	16.2796	-5.99328		0.0156979	0.250093	0.0297611	0.284409	0.0178519
		22.0105	16.3491		-5.73094		0.0188285	0.299967
		21.9952	16.333		-5.71564		0.0190292	0.303165
20	S1	19.6258	16.8229	16.814	-2.8118		0.142418	2.26895	0.135097	2.11305	0.132632
		19.7794	16.7275		-2.96538		0.128036	2.03982
		19.7861	16.8916		-2.97208		0.127443	2.03037
21	S2	19.793	16.463	16.4545	-3.33848		0.098859	1.57498	0.270767	1.55569	0.0976482
		20.0969	16.3976		-3.64242		0.0800795	1.27579
		19.5873	16.5028		-3.13282		0.114006	1.81629
22	S3	20.9217	15.9129	16.0327	-4.88899		0.0337495	0.537684	0.0625336	0.472729	0.0296725
		21.3025	15.9253		-5.26983		0.0259194	0.412936
		21.1233	16.26		-5.09057		0.0293485	0.467568
23	S5	20.1171	17.3359	17.3102	-2.80686		0.142906	2.27672	0.155896	2.14596	0.134699
		20.3233	17.3217		-3.01311		0.12387	1.97344
		20.1746	17.2731		-2.86438		0.137321	2.18774
24	S6	24.7426	23.541	23.6825	-1.0601		0.4796	7.64079	0.251376	7.931	0.497816
		24.6619	23.6074		-0.979332		0.507215	8.08073
		24.6635	23.8991		-0.980984		0.506634	8.07148
25	S7	20.442	17.4618	17.4961	-2.94583		0.129783	2.06765	0.575511	1.91614	0.120273
		20.2265	17.5732		-2.73034		0.15069	2.40074
		21.1338	17.4534		-3.63764		0.0803454	1.28003
26	S8	19.6525	15.8678	15.9007	-3.75181		0.0742323	1.18264	0.0381335	1.14545	0.0718978
		19.6963	15.895		-3.79562		0.0720119	1.14726
		19.7486	15.9393		-3.8479		0.0694493	1.10644
27	S9	20.1832	16.4879	16.4574	-3.72576		0.0755849	1.20419	0.167663	1.32274	0.0830264
		19.9239	16.352		-3.46645		0.090468	1.4413
		21.9261	16.5325		-5.46871
28	S10	19.8564	16.4358	16.3636	-3.4928		0.0888304	1.41521	0.181567	1.32243	0.0830069
		19.8325	16.2266		-3.46889		0.0903152	1.43886
		20.2027	16.4284		-3.83908		0.0698752	1.11322
29	S11	20.4629	16.3516	16.2814	-4.1815		0.0551118	0.878018	0.140832	0.743256	0.046653
		21.0193	15.9786		-4.73789		0.037476	0.597052
		20.6812	16.5139		-4.39984		0.0473713	0.754699
30	S12	19.267	16.2938	16.5524	-2.7146		0.152343	2.42707	0.555953	2.87381	0.180384
		18.7403	16.5716		-2.18794		0.219465	3.49643
		19.1143	16.7916		-2.56197		0.169344	2.69792
31	S13	19.8314	16.9056	17.0014	-2.82997		0.140635	2.24054	0.569744	2.68615	0.168605
		19.2605	16.9746		-2.25912		0.208899	3.3281
		19.6792	17.124		-2.67778		0.156281	2.48981
32	S14	20.7264	19.1159	19.0574	-1.66905		0.314461	5.00986	0.426249	5.50204	0.345354
		20.5287	18.9408		-1.47134		0.360647	5.74567
		20.5275	19.1154		-1.47011		0.360955	5.75059
33	S15	20.3365	17.7261	17.5557	-2.78078		0.145513	2.31825	0.107527	2.27969	0.143093
		20.3091	17.6887		-2.75343		0.148298	2.36262
		20.4397	17.2524		-2.88399		0.135467	2.1582
34	S16	20.2875	15.8928	15.9522	-4.33535		0.049537	0.789202	0.0688616	0.816621	0.051258
		20.3312	15.9531		-4.37898		0.0480612	0.765691
		20.1061	16.0107		-4.15391		0.0561757	0.894968
35	S17	18.8256	14.6709	14.7446	-4.08102		0.0590868	0.941347	0.0989621	1.039	0.0652164
		18.6868	14.8624		-3.94219		0.0650552	1.03643
		18.5503	14.7004		-3.80577		0.0715071	1.13922
36	S18	21.1343	16.3625	16.2715	-4.86285		0.0343666	0.547514	0.0180407	0.560271	0.0351673
		23.2868	16.2799		-7.01529
		21.0686	16.172		-4.79714		0.035968	0.573028
37	S19	20.8288	16.07	16.0921	-4.73662		0.0375089	0.597576	0.180151	0.805275	0.0505458
		20.2076	16.1455		-4.11548		0.0576922	0.919129
		20.2394	16.0609		-4.14723		0.0564363	0.89912
38	S20	20.869	17.2951	17.4181	-3.45092		0.0914468	1.45689	0.358512	1.64052	0.102973
		20.9152	17.6197		-3.49707		0.0885678	1.41103
		20.3737	17.3395		-2.95563		0.128904	2.05365
39	S21	19.4066	16.4551	16.7301	-2.67654		0.156416	2.49196	0.325967	2.3316	0.146351
		19.7556	17.2575		-3.02553		0.122807	1.95651
		19.3755	16.4776		-2.6454		0.159828	2.54632
40	S22	18.3448	15.5096	15.6239	-2.72087		0.151683	2.41654	0.267154	2.12415	0.13333
		18.6972	15.8426		-3.07329		0.118808	1.8928
		18.5729	15.5196		-2.94899		0.129498	2.06311
41	S4	21.9709	17.4589	17.3956	-4.57528		0.0419471	0.668284	0.0506281	0.609826	0.0382778
		22.1727	17.4147		-4.77712		0.0364708	0.581037
		22.1749	17.3132		-4.7793		0.0364156	0.580157
42	S23	19.8402	14.3094	14.4248	-5.41538		0.023432	0.373308	0.0154425	0.382732	0.0240234
		19.7385	14.5221		-5.31375		0.0251421	0.400553
		19.8362	14.4428		-5.41142		0.0234963	0.374333
